# Supplementary material
Source: PubMed Central journal article supplement (PMC9092308)
Supplement: mmc1.pdf [file mmc1.pdf]

YMTHE, Volume 30

## **Supplemental Information**

**Bacteria-enabled oral delivery of a replicon-based  
mRNA vaccine candidate protects against  
ancestral and delta variant SARS-CoV-2**

**Vijayakumar Jawalagatti, Perumalraja Kirthika, Chamith Hewawaduge, Myeon-sik Yang, Ji-Young Park, Byungkwan Oh, and John Hwa Lee**

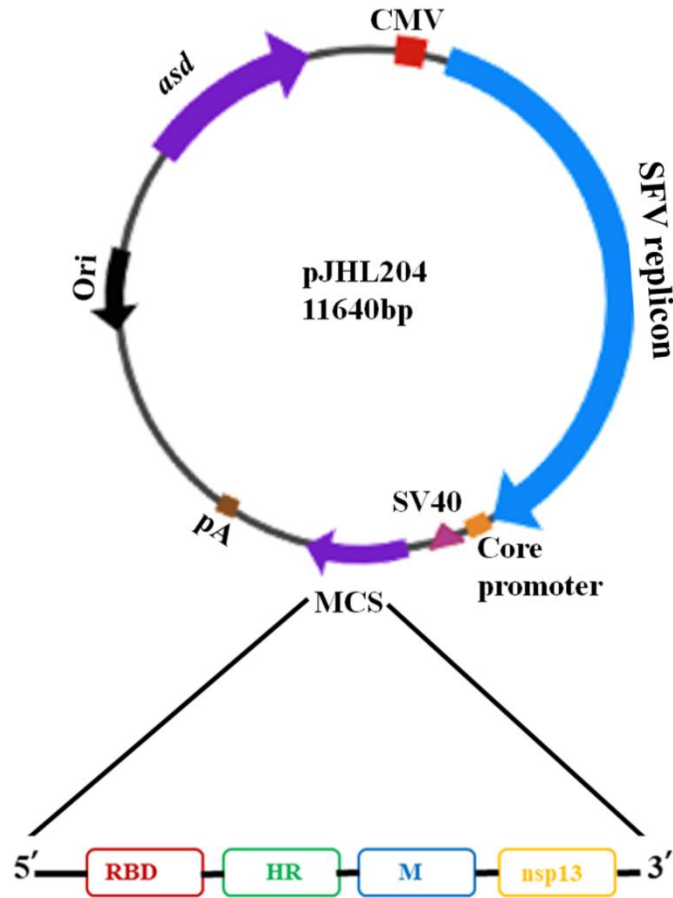

1

2 **Supplementary Figure 1. pJHL204, a SFV replicon-based vector design**

3 The CMV promoter, SFV replicon (nsp1–4), SFV sub-genomic core promoter, SV40 promoter,  
 4 MCS region, polyadenylation signal (pA), asd marker and pBR origin are described. The SFV  
 5 non-structural proteins (nsp1–4) form a replicase complex to drive transgene expression as a  
 6 self-replicating and self-transcribing mRNA. MCS comprises the ApaI, AscI, PacI, AsiSI and  
 7 PstI restriction sites for gene cloning. The *asd* serves as an auxotrophic selection marker for  
 8 antibiotic-free gene delivery. SFV MCS region has been enlarged to show the multicistronic  
 9 vaccine construct containing RBD, HR, M and nsp13 epitopes of SARS-CoV-2, each target  
 10 sequence is separated by viral self-cleaving peptide, P2A. SFV- Semliki Forest Virus.

11

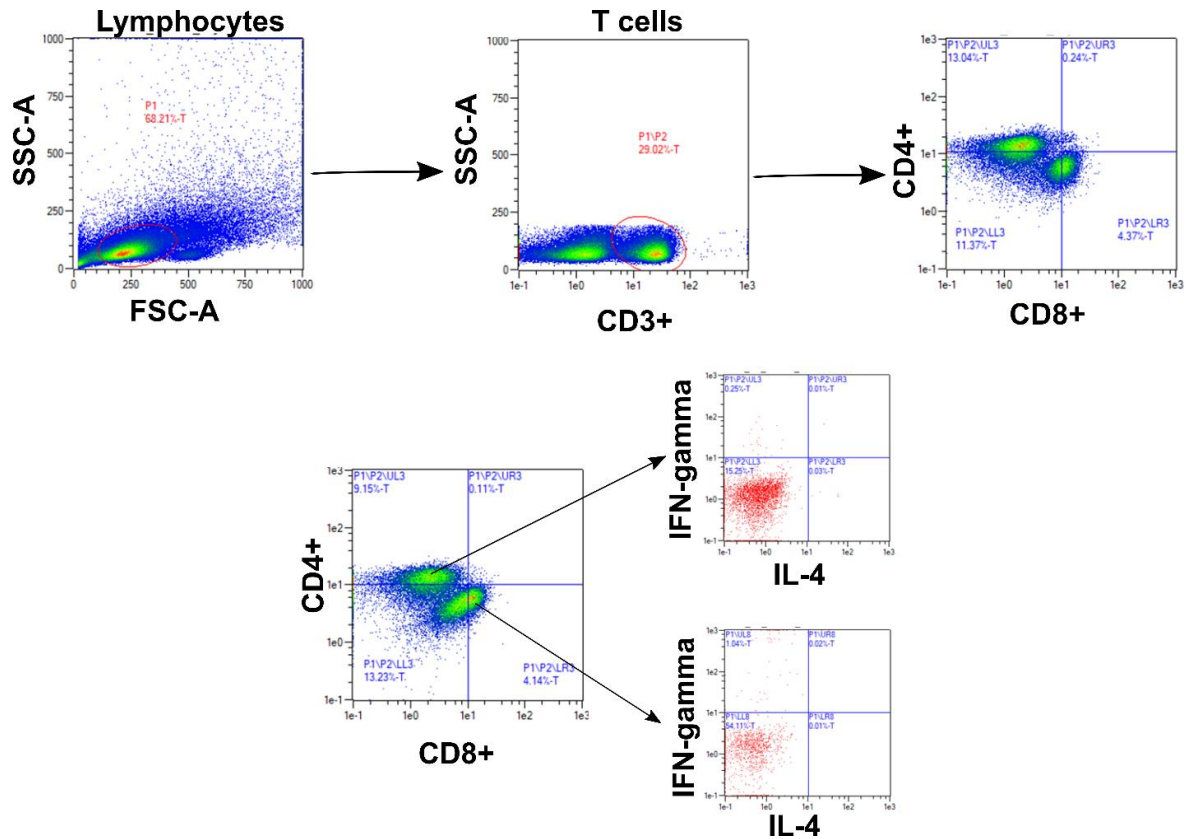

12

13 **Supplementary Figure 2. Gating strategy and analysis of CD4 and CD8 T cells**

14 Firstly, lymphocytes were gated by side and forward scatter properties. CD3+ T cells were  
 15 stratified into CD4 and CD8 T cells. Finally, population of cells expressing IFN- $\gamma$  and IL-4  
 16 intracellular markers were profiled for CD4 and CD8 T cells.

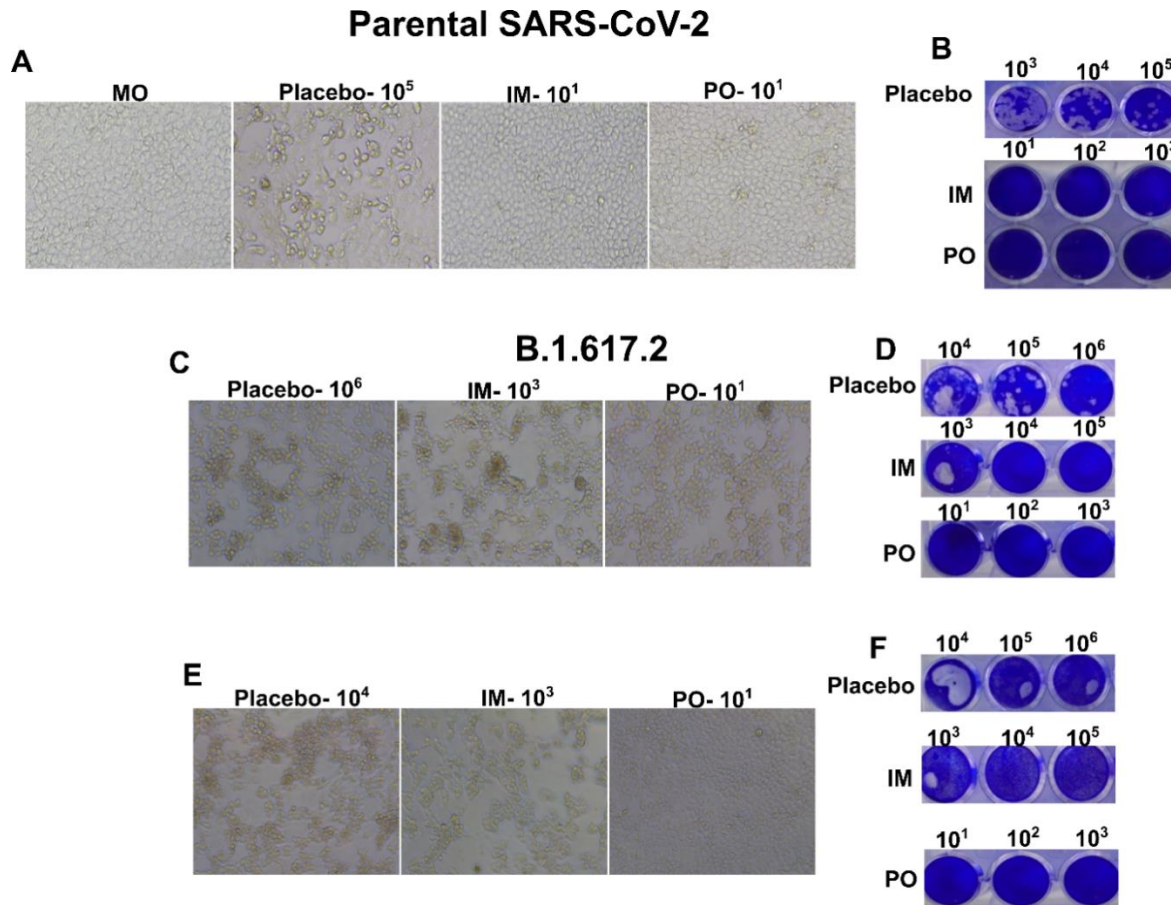

17

18 **Supplementary Figure 3 (Related to Figure 5). Assessment of live viral load in vaccinated**  
 19 **and placebo hamsters.**

20 Hamsters were immunized via intramuscular and oral routes. The intramuscular injection  
 21 consisted of a single dose of  $2 \times 10^7$  colony-forming units (CFU). Whereas, the oral route of  
 22 administration consisted of two doses of  $2 \times 10^8$  CFU at a 2-week interval. Hamsters were  
 23 challenged three weeks after the final immunization with  $1 \times 10^4$  PFU of either parental strain or  
 24 delta variant. Representative CPE (A, C and E) and plaque (B, D and F) images are shown. (A-B)  
 25 and (C-D), respectively, lung sample data from hamsters challenged with parental and delta  
 26 variant SARS-CoV-2. (E-F) Nasal wash data from hamsters challenged with delta variant SARS-  
 27 CoV-2. IM- Intramuscular; PO- Per os; B.1.617.2- Delta variant SARS-CoV-2.
